# Supplementary material for: Volatile organic compounds at a rural site in Beijing: Influence of temporary emission control and wintertime heating
Source: Copernicus journal article supplement (doi:10.5194/acp-2018-29), 2018-02-22
Supplement: Supplementary file 1 [file acp-2018-29-supplement.pdf]

## Supplement information

### **Volatile organic compounds at a rural site in Beijing: Influence of temporary emission control and wintertime heating**

Weiqliang Yang<sup>1,3</sup>, Yanli Zhang<sup>1,2\*</sup>, Xinming Wang<sup>1,2,3\*</sup>, Sheng Li<sup>1,3</sup>, Ming Zhu<sup>1,3</sup>,  
Qingqing Yu<sup>1,3</sup>, Guanghui Li<sup>1,3</sup>, Zhonghui Huang<sup>1,3</sup>, Huina Zhang<sup>1,3</sup>, Zhenfeng Wu<sup>1,3</sup>,  
Wei Song<sup>1</sup>, Jihua Tan<sup>3</sup>, Min Shao<sup>4,5</sup>

1 State Key Laboratory of Organic Geochemistry and Guangdong Key Laboratory of  
Environmental Protection and Resources Utilization, Guangzhou Institute of  
Geochemistry, Chinese Academy of Sciences, Guangzhou 510640, China

2 Center for Excellence in Regional Atmospheric Environment, Institute of Urban  
Environment, Chinese Academy of Sciences, Xiamen 361021, China

3 University of Chinese Academy of Sciences, Beijing 100049, China

4 State Joint Key Laboratory of Environmental Simulation and Pollution Control,  
College of Environmental Sciences and Engineering, Peking University, Beijing  
100871, China

5 Institute for Environmental and Climate Research, Jinan University, Guangzhou  
511443, China

\*corresponding authors:

Dr. Yanli Zhang

State key Laboratory of Organic Geochemistry,

Guangzhou Institute of Geochemistry,

23 Chinese Academy of Sciences, Guangzhou 510640, China

24 Tel.: +86-20-85292718; fax: +86-20-85290706.

25 E-mail: zhang\_yl86@gig.ac.cn

26 Dr. Xinming Wang

27 State key Laboratory of Organic Geochemistry,

28 Guangzhou Institute of Geochemistry,

29 Chinese Academy of Sciences, Guangzhou 510640, China

30 Tel.: +86-20-85290180; fax: +86-20-85290706.

31 E-mail: wangxm@gig.ac.cn

32

33 **1. Calculation of ozone formation potentials (OFPs) and secondary organic**

34 **aerosol formation potentials (SOAFPs)**

35 The OFP of individual VOC species  $i$ ,  $OFP(i)$ , is calculated by the following equation:

36  $OFP(i) = conc(i) \times MIR(i)$

37 where  $conc(i)$  is the concentration of VOC species  $i$ , and  $MIR(i)$  is the maximum

38 incremental reactivity coefficient of VOC species  $i$ , which is defined by [Carter \(2009\)](#).

39 SOAFPs is estimated using the following formula:

40  $SOAFPs = \sum_i X_i \times Y_i$

41 where  $X_i$  is the mass concentration of precursor  $i$  ( $\mu\text{g m}^{-3}$ ), and  $Y_i$  (%) is the SOA yield

42 of precursor  $i$ . In this study, the SOA yields are taken from [Ng et al \(2007\)](#), [Lim and](#)

43 [Ziemann \(2009\)](#) and [Loza et al \(2014\)](#).

44

45 **Table S1. Ozone formation potentials (OFPs) of VOCs in the air masses from the**  
 46 **south and the north during period I, II and III.**

|            |                    | Ozone formation potentials, ppbv |         |           |        |        |
|------------|--------------------|----------------------------------|---------|-----------|--------|--------|
|            |                    | Alkanes                          | Alkenes | Aromatics | Ethyne | Sum    |
| Period I   |                    | 10.02                            | 25.90   | 21.81     | 2.91   | 60.64  |
| Period II  |                    | 4.51                             | 17.42   | 5.07      | 1.51   | 28.51  |
| Period III |                    | 8.78                             | 36.73   | 13.17     | 2.80   | 61.47  |
| Period I   | South <sup>a</sup> | 12.04                            | 30.03   | 23.57     | 3.58   | 69.21  |
|            | North <sup>b</sup> | 3.97                             | 13.53   | 16.53     | 0.90   | 34.92  |
| Period II  | South <sup>a</sup> | 6.07                             | 20.46   | 7.29      | 2.08   | 35.89  |
|            | North <sup>b</sup> | 2.27                             | 13.04   | 1.85      | 0.69   | 17.86  |
| Period III | South <sup>a</sup> | 14.15                            | 67.64   | 25.40     | 5.51   | 112.70 |
|            | North <sup>b</sup> | 5.93                             | 20.38   | 6.70      | 1.36   | 34.39  |

47 <sup>a</sup> For the datasets in the southerly air masses; <sup>b</sup> For the datasets in the northerly air masses.

48

49 **Table S2. Secondary organic aerosol formation potentials (SOAFPs) of VOCs in**  
 50 **the southerly and northerly air masses during period I, II and III.**

|            |                    | Secondary organic aerosol formation potentials, $\mu\text{g m}^{-3}$ |           |       |          |           |      |
|------------|--------------------|----------------------------------------------------------------------|-----------|-------|----------|-----------|------|
|            |                    | Low-NOx                                                              |           |       | High-NOx |           |      |
|            |                    | Alkanes                                                              | Aromatics | Sum   | Alkanes  | Aromatics | Sum  |
| Period I   |                    | 1.47                                                                 | 7.30      | 8.77  | 1.63     | 2.39      | 4.02 |
| Period II  |                    | 0.61                                                                 | 1.93      | 2.54  | 0.68     | 0.75      | 1.43 |
| Period III |                    | 0.68                                                                 | 4.62      | 5.30  | 0.75     | 1.68      | 2.43 |
| Period I   | South <sup>a</sup> | 1.66                                                                 | 8.08      | 9.74  | 1.83     | 2.71      | 4.54 |
|            | North <sup>b</sup> | 0.91                                                                 | 4.96      | 5.86  | 1.01     | 1.44      | 2.45 |
| Period II  | South <sup>a</sup> | 0.75                                                                 | 2.80      | 3.55  | 0.84     | 1.09      | 1.92 |
|            | North <sup>b</sup> | 0.40                                                                 | 0.68      | 1.09  | 0.45     | 0.27      | 0.72 |
| Period III | South <sup>a</sup> | 1.08                                                                 | 9.11      | 10.19 | 1.17     | 3.37      | 4.54 |
|            | North <sup>b</sup> | 0.47                                                                 | 2.25      | 2.72  | 0.52     | 0.79      | 1.31 |

51 <sup>a</sup> For the datasets in the southerly air masses; <sup>b</sup> For the datasets in the northerly air masses.

52

53 **Table S3. Average reductions (ppbv) of VOCs contributed by different sources as**  
 54 **derived from the PMF source apportioning results**

| Sources              | Average sources reduction contribution, ppbv |                    |                    |
|----------------------|----------------------------------------------|--------------------|--------------------|
|                      | All <sup>a</sup>                             | South <sup>b</sup> | North <sup>c</sup> |
| Gasoline exhaust     | 3.18                                         | 4.00               | 0.57               |
| Industrial emission  | 1.35                                         | 1.77               | 0.27               |
| Solvent use          | 4.29                                         | 4.90               | 2.22               |
| Diesel exhaust       | 2.28                                         | 2.03               | 1.71               |
| Coal/biomass burning | 0.31                                         | 0.16               | 0                  |
| <b>Total</b>         | <b>11.41</b>                                 | <b>12.86</b>       | <b>4.77</b>        |

55 <sup>a</sup> For all the data; <sup>b</sup> For the datasets in the southerly air masses; <sup>c</sup> For the datasets in the northerly air masses.

56

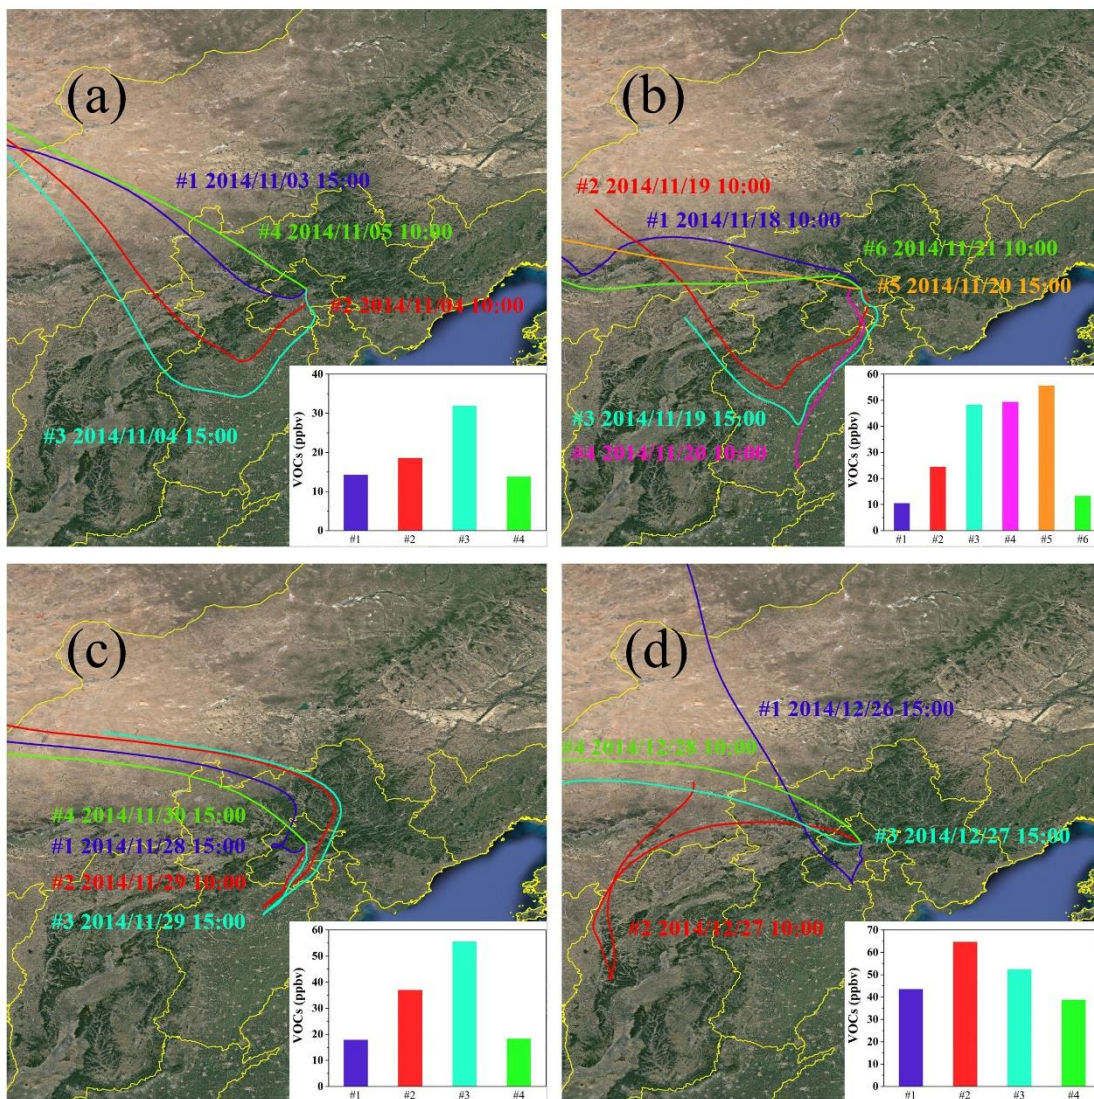

57

58 Figure S1. Mixing ratios of VOCs and corresponding back trajectories of air masses  
 59 arriving at 100 m above the ground level during (a) 3-5 November, (b) 18-21 November,  
 60 (c) 28-30 November, and (d) 26-28 December, respectively.

61

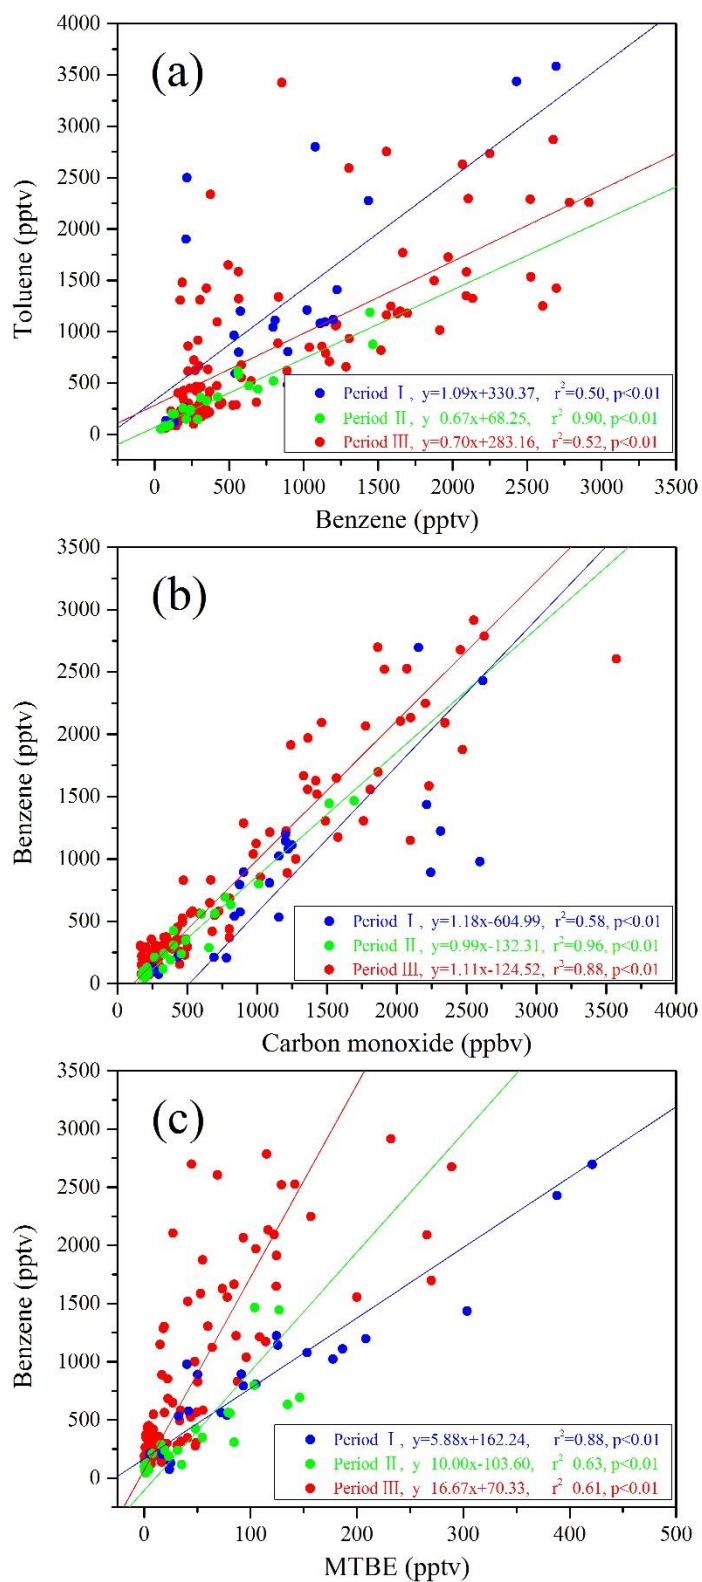

62

63 Figure S2. Scatter plots of (a) toluene versus benzene, (b) benzene versus carbon

64 monoxide, and (c) benzene versus methyl tert-butyl ether (MTBE), during period I (in

65 blue), II (in green) and III (in red).

66



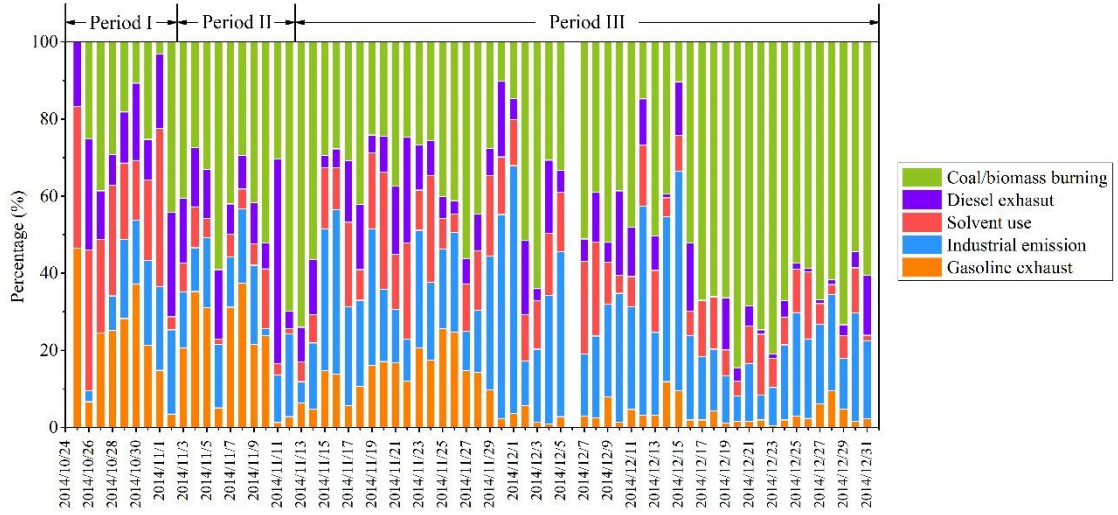

67

68 Figure S3. Time series of source contributions based on PMF results (No data on  
 69 2014/12/6 due to unexpected power failure).

70

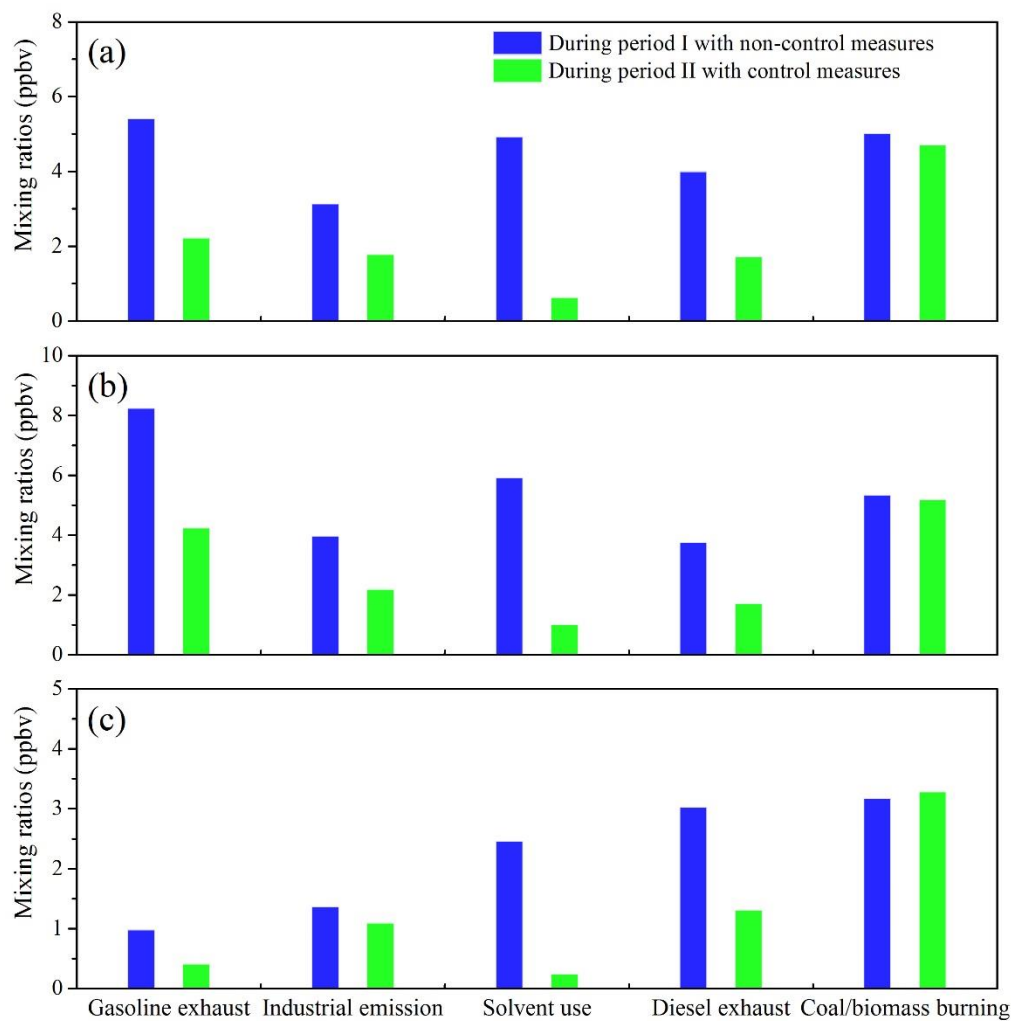

71

72 Figure S4. Sources contributions (a) in all samples, (b) in the air masses from the south,

73 and (c) in the air masses from north during period I and II, as resolved from PMF model.

74

75 References

76 Carter, W. P. L.: Update maximum incremental reactivity scale and hydrocarbon bin  
77 reactivities for regulatory application, California Air Resources Board Contract  
78 07-339., 2009.

79 Lim, Y. B., and Ziemann, P. J.: Effects of molecular structure on aerosol yields from  
80 OH radical-initiated reactions of linear, branched, and cyclic alkanes in the  
81 presence of NO<sub>x</sub>, Environ. Sci. Technol., 43, 2328-2334,  
82 <http://dx.doi.org/10.1021/es803389s>, 2009.

83 Loza, C.L., Craven, J.S., Yee, L.D., Coggon, M.M., Schwantes, R.H., Shiraiwa, M.,  
84 Zhang, X., Schilling, K.A., Ng, N.L., Canagaratna, M.R., Ziemann, P.J., Flagan,  
85 R.C., Seinfeld, J.H.: Secondary organic aerosol yields of 12-carbon alkanes,  
86 Atmos. Chem. Phys., 14, 1423-1439, <http://doi.org/10.5194/acp-14-1423-2014>,  
87 2014.

88 Ng, N. L., Kroll, J. H., Chan, A. W. H., Chhabra, P. S., Flagan, R. C., and Seinfeld, J.  
89 H.: Secondary organic aerosol formation from m-xylene, toluene, and benzene,  
90 Atmos. Chem. Phys., 7, 3909-3922, <http://doi.org/10.5194/acp-7-3909-2007>, 2007.
